# Supplementary material for: The strawberry-derived permeation enhancer pelargonidin enables oral protein delivery
Source: PubMed Central journal article supplement — Proc Natl Acad Sci U S A. 2022 Aug 9;119(33):e2207829119. doi: 10.1073/pnas.2207829119 (PMC9388159; doi:10.1073/pnas.2207829119), 2022-08-09
Supplement: pnas.2207829119.sapp.pdf [file pnas.2207829119.sapp.pdf]

## Supplementary Information for

### The strawberry-derived permeation enhancer pelargonidin enables oral protein delivery

Nicholas G. Lamson<sup>1</sup>, Katherine C. Fein<sup>1</sup>, John P. Gleeson<sup>1</sup>, Alexandra N. Newby<sup>1</sup>, Sijie Xian<sup>1</sup>, Kyle Cochran<sup>1</sup>, Namit Chaudhary<sup>1</sup>, Jilian R. Melamed<sup>1</sup>, Rebecca L. Ball<sup>1</sup>, Kanika Suri<sup>1</sup>, Vishal Ahuja<sup>1,2</sup>, Anna Zhang<sup>1,2</sup>, Adrian Berger<sup>1,2</sup>, Dmytro Kolodieznyi<sup>3</sup>, Brigitte F. Schmidt<sup>3</sup>, Gloria L. Silva<sup>3</sup>, Kathryn A. Whitehead<sup>1,2,\*</sup>

<sup>1</sup>Department of Chemical Engineering, Carnegie Mellon University, Pittsburgh, Pennsylvania, 15213

<sup>2</sup>Department of Biomedical Engineering, Carnegie Mellon University, Pittsburgh, Pennsylvania, 15213

<sup>3</sup>Department of Chemistry, Carnegie Mellon University, Pittsburgh, Pennsylvania, 15213

\*Correspondence to Kathryn A. Whitehead at [kawhite@cmu.edu](mailto:kawhite@cmu.edu)

#### **This PDF file includes:**

Figures S1 to S8

Tables S1 to S3

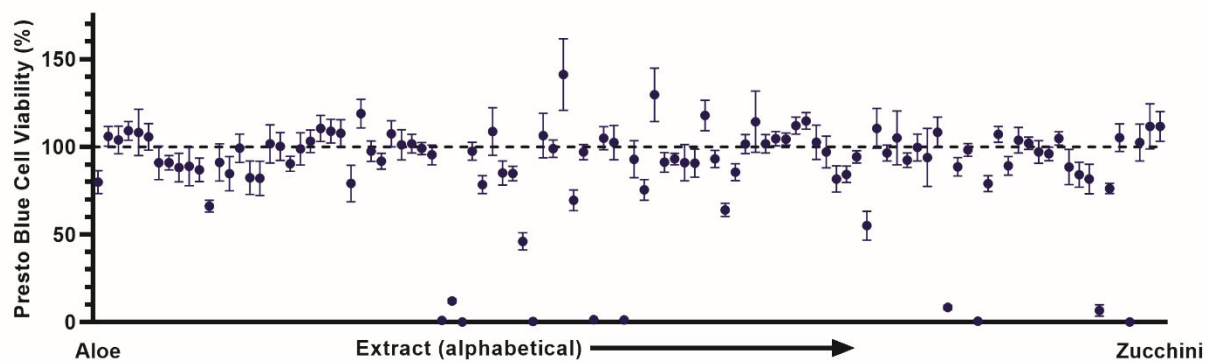

**Figure S1. Crude extracts were generally well-tolerated by Caco-2 cells.** By the PrestoBlue® viability assay, only a handful of extracts were toxic to intestinal cells following three hours of exposure. Error bars display s.e.m. (n = 8 technical replicate wells).

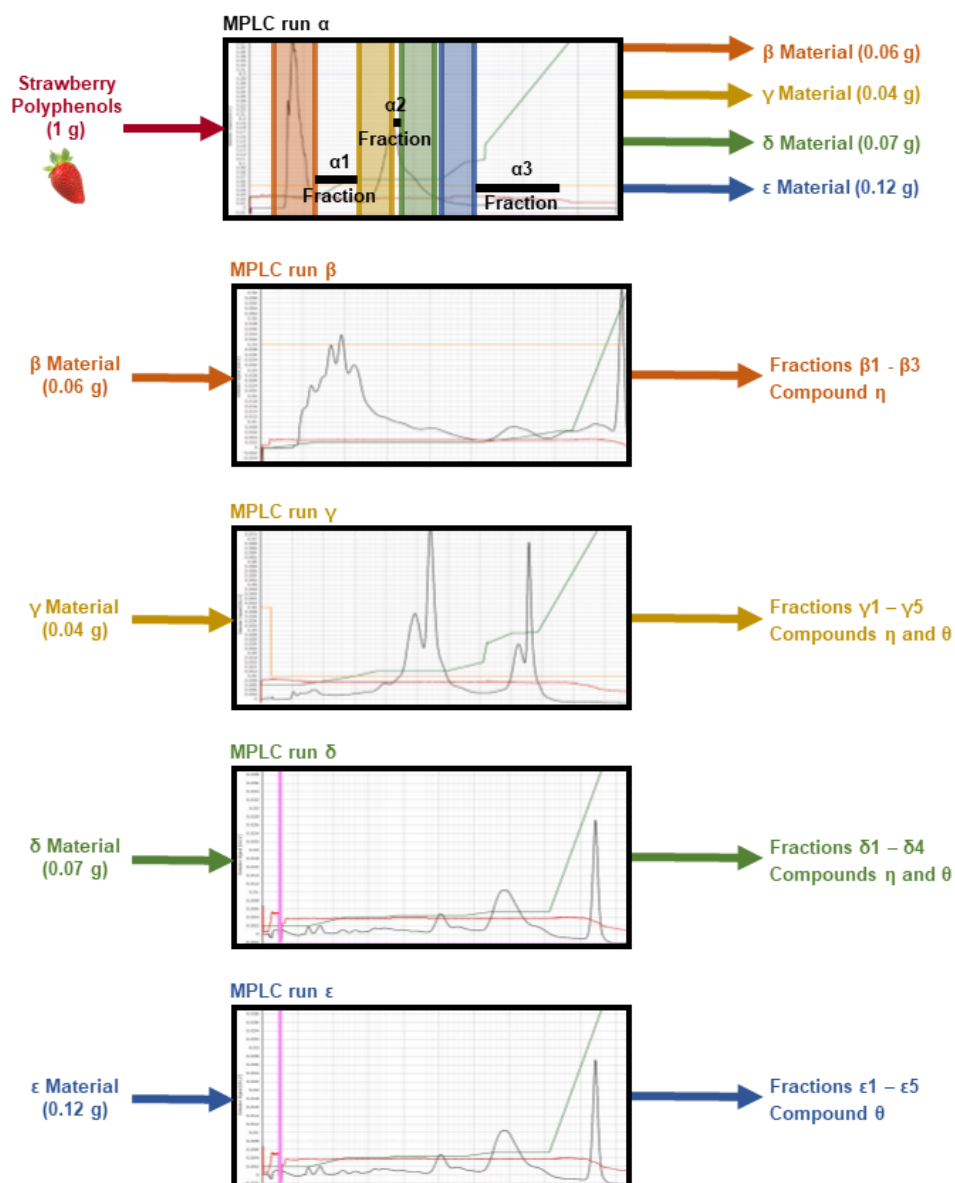

**Figure S2: An MPLC separation scheme was used to resolve the strawberry polyphenols into 22 fractions.** Each MPLC run was assigned a Greek letter identifier, moving consecutively through the alphabet. The first MPLC run ( $\alpha$ ) yielded fractions that were divided into seven groups, based on fraction color and ultra performance liquid chromatography (UPLC) traces of the eluents. Four of these groups produced enough material to support a second tier of MPLC runs, yielding fractions for the  $\beta$ ,  $\gamma$ ,  $\delta$ , and  $\epsilon$  runs, respectively. UPLC traces identified two pure compounds, each of which appeared as discrete fractions in three of the four runs. Fractions with identical HPLC traces of a single compound were pooled together to yield the samples denoted as Compound  $\eta$  and Compound  $\theta$ .

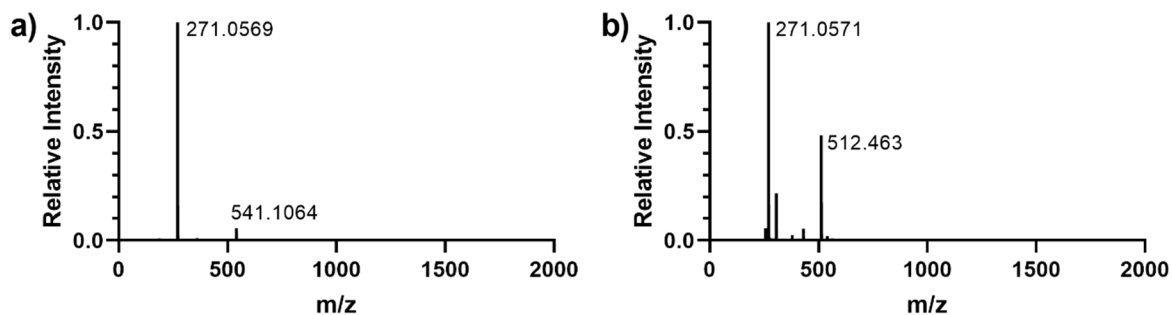

**Figure S3: ESI-TOF mass spectrometry matched the active component in strawberry with a commercial pelargonidin standard. (a)** While both commercially purchased pelargonidin and **(b)** the MPLC fraction  $\epsilon$ 3 contained a small number of impurities, the peak of interest for protonated pelargonidin (271 g/mol), in positive ion mode, was the most prominent in each case.

a)

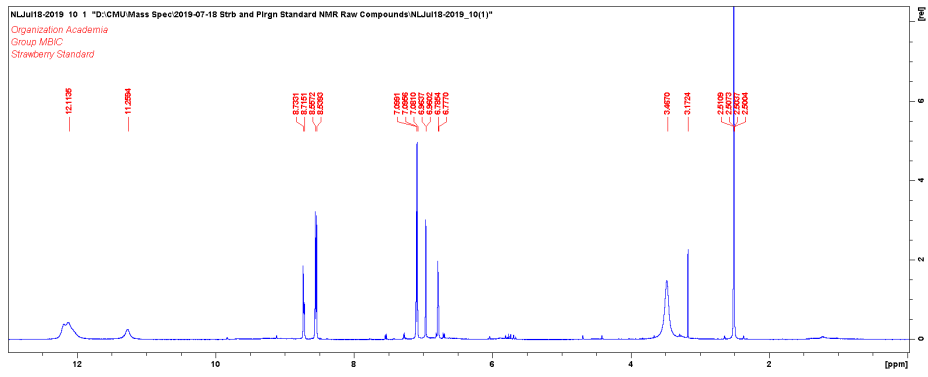

b)

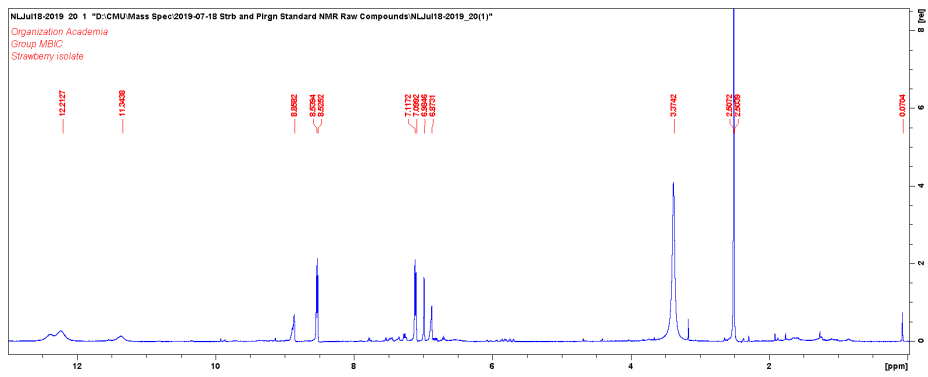

c)

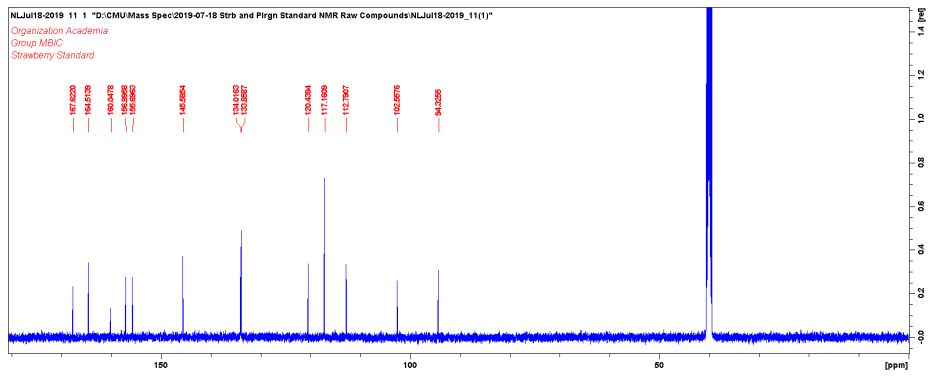

d)

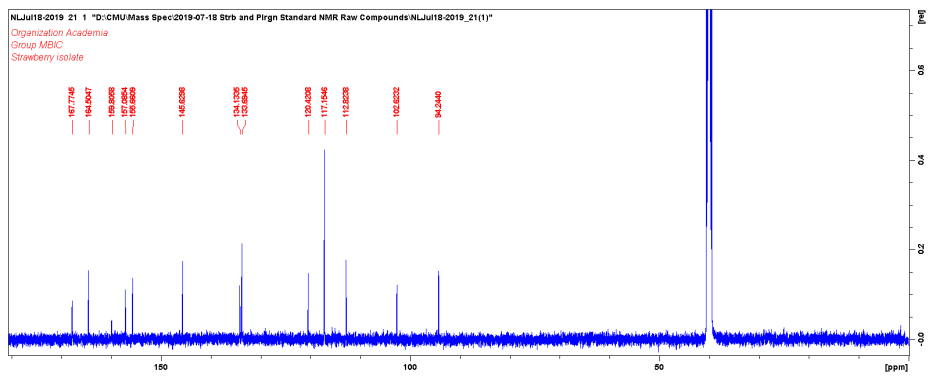

(e)

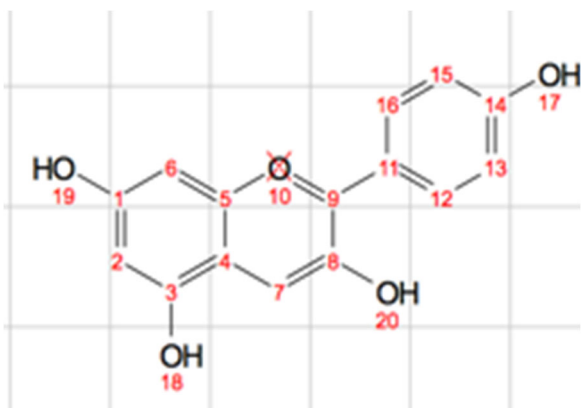

**Assignments:**

|        |             |
|--------|-------------|
| #1     | 167.79      |
| #2     | 6.88/102.64 |
| #3     | 155.68      |
| #4     | 112.83      |
| #5     | 157.10      |
| #6     | 6.97/95.27  |
| #7     | 8.73/134.15 |
| #8     | 160.74      |
| #9     | 145.64      |
| #11    | 120.45      |
| #12,16 | 8.53/133.75 |
| #13,15 | 7.10/117.17 |
| #14    | 164.51      |

**Figure S4: NMR confirmed that fraction  $\epsilon 3$  was the same chemical entity as commercially purchased pelargonidin. (a) Standard  $^1\text{H}$  NMR** (500 MHz,  $\text{DMSO-}d_6$ )  $\delta$  12.16 (m, 3H), 11.27 (s, 1H), 8.86 – 8.70 (m, 1H), 8.55 (dd,  $J = 9.0, 1.8$  Hz, 2H), 7.25 – 7.06 (m, 2H), 6.96 (d,  $J = 1.9$  Hz, 1H), 6.87 – 6.77 (m, 1H). **(b) Fraction  $^1\text{H}$  NMR** (500 MHz,  $\text{DMSO-}d_6$ )  $\delta$  12.31 (d,  $J = 80.7$  Hz, 3H), 11.36 (s, 1H), 8.96 – 8.82 (m, 1H), 8.53 (dd,  $J = 9.3, 2.4$  Hz, 2H), 7.20 – 7.07 (m, 2H), 6.99 (t,  $J = 2.1$  Hz, 1H), 6.88 (dt,  $J = 5.9, 2.6$  Hz, 1H). **(c) Standard  $^{13}\text{C}$  NMR** (126 MHz,  $\text{DMSO}$ )  $\delta$  167.64, 164.52, 160.06, 157.01, 155.70, 145.59, 134.04, 133.87, 120.45, 117.17, 112.80, 102.57, 94.34. **(d) Fraction  $^{13}\text{C}$  NMR** (126 MHz,  $\text{DMSO}$ )  $\delta$  167.79, 164.51, 160.74, 157.10, 155.68, 145.64, 134.15, 133.75, 120.44, 117.17, 112.83, 102.64, 94.27. **(e)** Assignments are given based on the NMR readout from the fraction run. Solvent peaks are  $\text{DMSO-}d_6$  (2.5 for  $^1\text{H}$  and 40 for  $^{13}\text{C}$ ) and residual water (3.3 for  $^1\text{H}$ ).

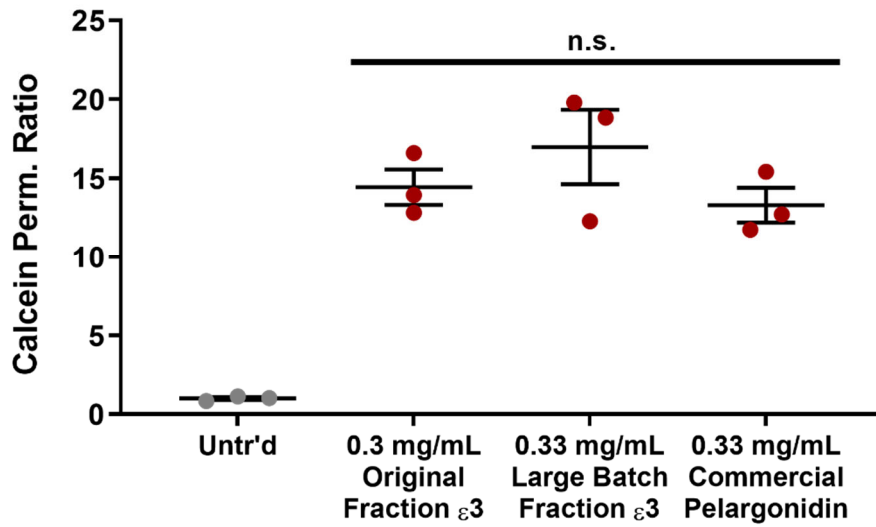

**Figure S5: Similar permeation enhancing activity was confirmed across two batches of active chromatography fractions.** With respect to commercially purchased pelargonidin and one another, there were no statistically significant differences in calcein permeability ratio of treated Caco-2 monolayers. Error bars display s.e.m. (n = 3); n.s. = not statistically significant by Student's t-test with Welch's correction.

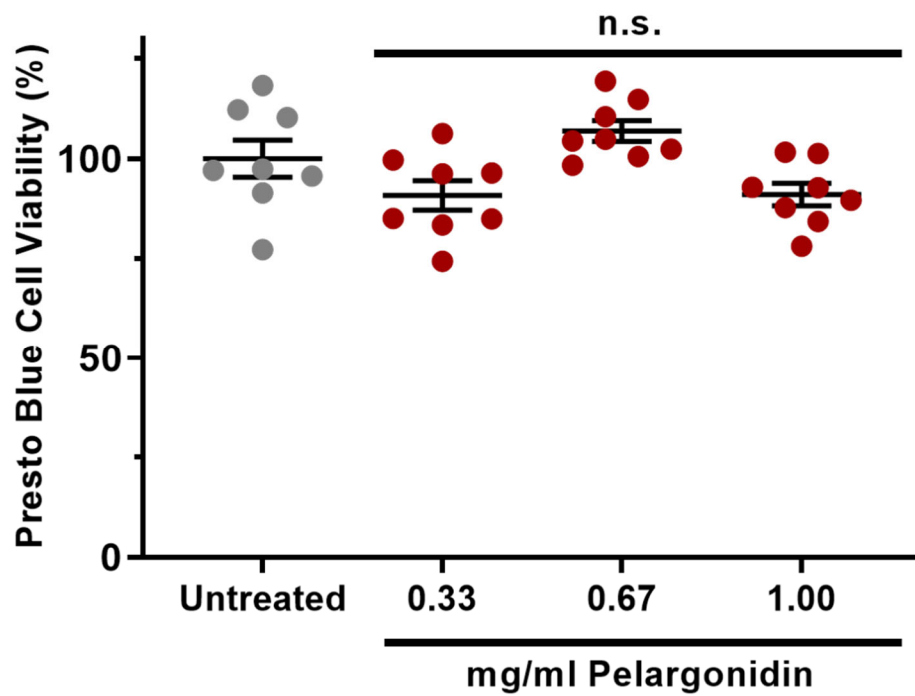

**Figure S6: Pelargonidin standards did not reduce the viability of treated Caco-2 cells, as measured by the Presto Blue assay.** Cells were treated for three hours with a range of pelargonidin concentrations, and none of the treatments induced statistically significant toxicity. Error bars display s.e.m. (n = 8 replicate wells); n.s. = not statistically significant by Student's t-test with Welch's correction, compared to untreated control cells.



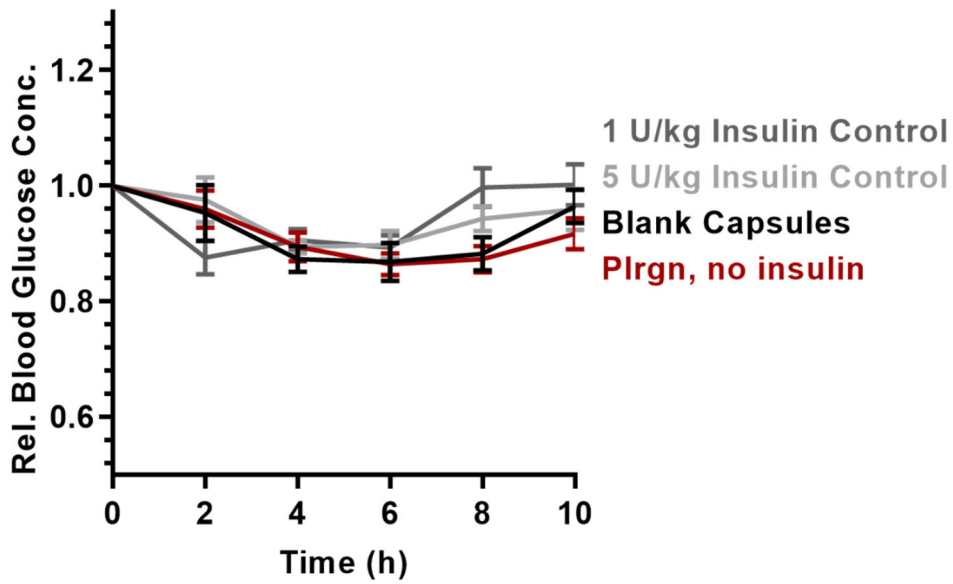

**Figure S7: Reductions in blood glucose in mice require both insulin and pelargonidin.** Orally administered capsules containing only insulin (dark gray, light gray) or only pelargonidin (dark red) did not differ in their effects on blood glucose when compared to blank capsules containing only inert BSA filler. Error bars display s.e.m. (n = 5-6).

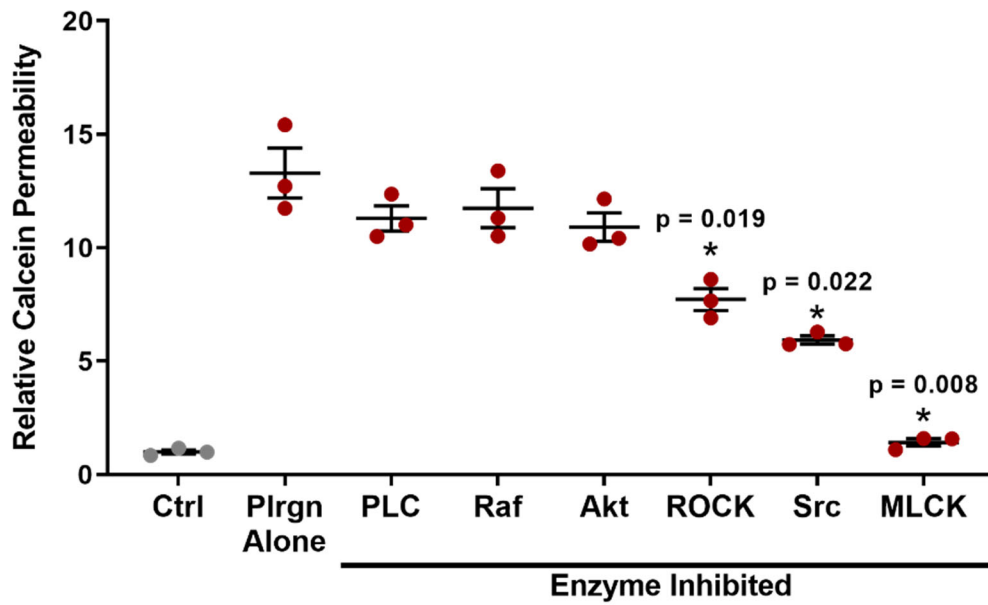

**Figure S8: Pelargonidin increases epithelial permeability by an MLCK-dependent mechanism.** Pre-treatment of Caco-2 intestinal cells with small molecule inhibitors of several epithelial signaling enzymes did not affect the efficacy of pelargonidin. However, the presence of an MLCK inhibitor completely eliminated any permeation enhancing effects. Src and ROCK may be partially involved in the signaling that directs opening of tight junctions, but there are likely more pathways between pelargonidin and MLCK than only these two. Error bars display s.e.m. (n = 3). \* p < 0.05 by Student's t-test with Welch's correction.

**Table S1. Presto viability, TEER, and calcein permeability screening results for crude food extracts.** Viability ("Via.") columns are all presented with respect to untreated control cells. Some of the toxic extracts were not tested for TEER or calcein permeability. Lower values for "TEER % 3 h" denote more efficacious permeation enhancers. "TEER Rec." is short for TEER Recovery and denotes whether the average TEER value for the treated monolayers returned to at least 80% of its original value 24 hours after extract removal. "Calcein Class" indicates whether the extract (P)ermeabilized the monolayers or (C)losed tight junctions to a statistically significant extent, or caused (I)nsignificant differences from control. All data are arithmetic mean and standard error of the mean for three technical well replicates; \* p < 0.05 by Student's two-tailed t-test with respect to untreated control.

| Extract              | Via. % | Via. s.e.m. | *   | TEER % 3 h | TEER s.e.m. | TEER Rec. | Calcein Ratio | Calcein s.e.m. | Calcein Class |
|----------------------|--------|-------------|-----|------------|-------------|-----------|---------------|----------------|---------------|
| Aloe                 | 79.9   | 6.6         | Yes | 2.6        | 2.7         | No        | 28.6          | 3.2            | P             |
| Apple, Granny Smith  | 106.0  | 5.6         | No  | 73.1       | 6.9         | Yes       | 1.3           | 0.2            | I             |
| Apple, Red Delicious | 103.9  | 7.9         | No  | 110.3      | 13.4        | Yes       | 0.8           | 0.1            | I             |
| Asparagus            | 109.1  | 5.3         | No  | 30.5       | 9.7         | No        | 1.8           | 1.1            | I             |
| Avocado              | 108.2  | 13.2        | No  | 98.4       | 8.5         | Yes       | 1.5           | 0.4            | I             |
| Banana               | 105.6  | 7.6         | No  | 90.0       | 3.7         | Yes       | 0.7           | 0.1            | I             |
| Basil                | 90.9   | 9.6         | No  | 13.4       | 1.3         | No        | 9.5           | 2.3            | P             |
| Beans, Green         | 90.9   | 4.0         | No  | 51.6       | 6.4         | Yes       | 1.3           | 0.3            | I             |
| Beet                 | 88.2   | 8.2         | No  | 2.8        | 0.6         | No        | 52.5          | 18.2           | P             |
| Blackberry           | 88.9   | 11.0        | No  | 106.9      | 8.5         | Yes       | 0.8           | 0.1            | I             |
| Blueberry            | 86.9   | 6.8         | No  | 93.9       | 6.2         | Yes       | 0.5           | 0.2            | I             |
| Breadfruit           | 66.2   | 3.4         | Yes |            |             |           |               |                |               |
| Broccoli             | 91.0   | 10.7        | No  | 76.8       | 12.0        | Yes       | 0.7           | 0.0            | C             |
| Brussels Sprouts     | 84.6   | 9.8         | No  | 90.8       | 4.9         | Yes       | 0.8           | 0.1            | I             |
| Cabbage, Red         | 99.2   | 8.1         | No  | 73.6       | 10.9        | Yes       | 1.1           | 0.2            | I             |
| Cactus Pear          | 82.4   | 9.6         | No  | 101.9      | 1.8         | Yes       | 0.7           | 0.1            | I             |
| Cantaloupe           | 82.0   | 9.7         | No  | 106.5      | 8.5         | Yes       | 1.0           | 0.2            | I             |
| Carrots, Orange      | 101.7  | 10.9        | No  | 97.6       | 3.1         | Yes       | 1.4           | 0.7            | I             |
| Carrots, Purple      | 100.2  | 7.9         | No  | 115.4      | 11.5        | Yes       | 1.8           | 1.2            | I             |
| Celery               | 90.3   | 4.3         | No  | 87.0       | 7.4         | Yes       | 1.0           | 0.1            | I             |
| Chayote              | 98.8   | 9.2         | No  | 20.1       | 1.6         | Yes       | 4.7           | 0.6            | P             |
| Cherry, Red          | 103.2  | 6.4         | No  | 95.4       | 1.7         | Yes       | 0.9           | 0.1            | I             |
| Cherry, White        | 110.4  | 7.4         | No  | 95.6       | 1.3         | Yes       | 0.9           | 0.1            | I             |
| Chokeberry           | 108.9  | 6.8         | No  | 32.9       | 2.4         | No        | 0.8           | 0.1            | I             |
| Cilantro             | 107.7  | 7.7         | No  | 60.9       | 11.5        | No        | 0.9           | 0.1            | I             |

Table S1, continued

| Extract              | Via.<br>% | Via.<br>s.e.m. | *   | TEER<br>% 3 h | TEER<br>s.e.m. | TEER<br>Rec.? | Calcein<br>Ratio | Calcein<br>s.e.m. | Calcein<br>Class |
|----------------------|-----------|----------------|-----|---------------|----------------|---------------|------------------|-------------------|------------------|
| Corn                 | 79.1      | 10.5           | No  | 99.5          | 25.2           | Yes           | 1.1              | 0.1               | I                |
| Cranberry            | 118.9     | 8.2            | No  | 16.3          | 1.6            | No            | 5.2              | 0.3               | P                |
| Cucumber             | 97.5      | 5.8            | No  | 54.7          | 14.8           | Yes           | 1.7              | 0.3               | I                |
| Currant, Black       | 91.8      | 4.5            | No  | 22.6          | 2.5            | No            | 1.9              | 0.3               | I                |
| Currant, Red         | 107.4     | 7.4            | No  | 20.3          | 0.5            | No            | 2.6              | 0.3               | P                |
| Dill                 | 101.1     | 8.6            | No  | 43.7          | 6.2            | No            | 1.6              | 0.1               | P                |
| Dragonfruit          | 101.8     | 5.3            | No  | 87.5          | 11.6           | Yes           | 0.9              | 0.1               | I                |
| Eggplant             | 99.1      | 3.4            | No  | 92.1          | 6.7            | Yes           | 0.9              | 0.1               | I                |
| Fennel               | 95.4      | 5.6            | No  | 36.2          | 10.8           | Yes           | 2.4              | 0.8               | P                |
| Galangal             | 1.0       | 1.4            | Yes |               |                |               |                  |                   |                  |
| Garlic               | 12.0      | 1.2            | Yes | 18.5          | 3.3            | No            | 5.5              | 1.1               | I                |
| Ginger               | -0.1      | -0.8           | Yes | 1.6           | 1.1            | No            | 125.6            | 59.3              | I                |
| Grapefruit           | 97.5      | 5.1            | No  | 95.3          | 10.1           | Yes           | 0.9              | 0.1               | I                |
| Grapefruit Rind      | 78.4      | 5.1            | Yes |               |                |               |                  |                   |                  |
| Grapes, Green        | 108.8     | 13.6           | No  | 70.0          | 2.9            | Yes           | 0.9              | 0.2               | I                |
| Grapes, Red Seedless | 85.0      | 6.9            | No  | 16.7          | 0.6            | Yes           | 6.2              | 0.7               | P                |
| Guava                | 84.8      | 4.2            | Yes |               |                |               |                  |                   |                  |
| Horseradish          | 46.1      | 4.9            | Yes |               |                |               |                  |                   |                  |
| Huckleberry, Garden  | 0.4       | 0.2            | Yes |               |                |               |                  |                   |                  |
| Jalapeno             | 106.4     | 12.6           | No  | 57.7          | 12.6           | Yes           | 1.7              | 0.6               | I                |
| Jaltomato            | 98.9      | 4.9            | No  | 42.2          | 0.6            | Yes           | 1.7              | 0.1               | P                |
| Jicama               | 141.2     | 20.5           | No  | 91.7          | 5.8            | No            | 0.9              | 0.1               | I                |
| Kiwi                 | 69.4      | 5.9            | Yes |               |                |               |                  |                   |                  |
| Lemon                | 97.0      | 4.3            | No  | 14.7          | 0.9            | No            | 6.8              | 0.7               | P                |
| Lemon Rind           | 1.3       | 0.2            | Yes |               |                |               |                  |                   |                  |
| Lettuce              | 104.9     | 6.6            | No  | 65.1          | 7.8            | Yes           | 2.6              | 0.9               | I                |
| Lime                 | 102.4     | 9.8            | No  | 78.0          | 16.0           | Yes           | 2.7              | 0.8               | P                |
| Lime Rind            | 1.2       | 0.2            | Yes |               |                |               |                  |                   |                  |
| Mango                | 92.9      | 10.6           | No  | 101.5         | 4.2            | Yes           | 1.7              | 0.2               | I                |
| Mushroom             | 75.4      | 5.9            | Yes | 42.6          | 2.4            | No            | 2.5              | 0.5               | I                |
| Ñame                 | 129.7     | 15.3           | No  | 68.9          | 14.6           | Yes           | 1.0              | 0.6               | I                |
| Nectarine            | 91.2      | 5.6            | No  | 57.7          | 5.0            | Yes           | 3.0              | 0.7               | P                |

Table S1, continued

| Extract                  | Via.<br>% | Via.<br>s.e.m. | *   | TEER<br>% 3 h | TEER<br>s.e.m. | TEER<br>Rec.? | Calcein<br>Ratio | Calcein<br>s.e.m. | Calcein<br>Class |
|--------------------------|-----------|----------------|-----|---------------|----------------|---------------|------------------|-------------------|------------------|
| Okra                     | 93.1      | 3.3            | No  | 120.7         | 20.2           | Yes           | 0.8              | 0.1               | I                |
| Onion, Red               | 90.9      | 10.3           | No  | 75.2          | 7.8            | Yes           | 1.0              | 0.1               | I                |
| Onion, Yellow            | 90.6      | 8.0            | No  | 71.7          | 6.3            | Yes           | 1.3              | 0.1               | I                |
| Orange                   | 117.9     | 8.7            | No  | 108.7         | 5.0            | Yes           | 0.5              | 0.2               | I                |
| Orange Rind              | 64.0      | 3.7            | Yes |               |                |               |                  |                   |                  |
| Otricoli Orange<br>Berry | 93.1      | 4.9            | No  | 48.3          | 3.8            | Yes           | 1.2              | 0.1               | I                |
| Papaya                   | 85.5      | 4.8            | Yes |               |                |               |                  |                   |                  |
| Parsley                  | 101.5     | 5.4            | No  | 30.7          | 8.6            | Yes           | 5.0              | 0.7               | P                |
| Parsnip                  | 114.3     | 17.5           | No  | 95.7          | 13.6           | Yes           | 1.1              | 0.1               | I                |
| Passionfruit             | 101.8     | 5.3            | No  | 41.9          | 7.3            | Yes           | 2.4              | 0.3               | P                |
| Peach                    | 104.7     | 4.1            | No  | 111.4         | 10.6           | Yes           | 0.3              | 0.2               | I                |
| Peach, White             | 104.4     | 3.4            | No  | 120.8         | 9.2            | Yes           | 0.5              | 0.3               | I                |
| Pear, Anjou              | 112.1     | 4.9            | No  | 90.5          | 9.3            | Yes           | 2.7              | 0.4               | I                |
| Pear, Asian              | 114.8     | 4.8            | No  | 87.7          | 20.0           | Yes           | 3.9              | 2.1               | I                |
| Pepino                   | 102.6     | 9.7            | No  | 29.7          | 3.3            | Yes           | 2.3              | 0.2               | P                |
| Pepper, Green Bell       | 97.1      | 9.1            | No  | 43.5          | 3.5            | No            | 1.9              | 0.2               | P                |
| Pepper, Red Bell         | 81.7      | 7.5            | Yes | 88.5          | 1.8            | Yes           | 0.9              | 0.2               | I                |
| Peppermint               | 84.2      | 4.8            | No  | 41.3          | 11.3           | Yes           | 3.6              | 0.9               | P                |
| Persimmon                | 94.3      | 3.5            | No  | 89.6          | 14.2           | Yes           | 1.6              | 0.7               | I                |
| Pineapple                | 55.0      | 8.3            | Yes |               |                |               |                  |                   |                  |
| Plum, Purple             | 110.5     | 11.3           | No  | 40.9          | 3.5            | Yes           | 1.6              | 0.2               | I                |
| Plum, Yellow             | 96.5      | 4.5            | No  | 63.4          | 3.6            | Yes           | 1.1              | 0.1               | I                |
| Pomegranate              | 105.1     | 15.4           | No  | 104.1         | 9.1            | Yes           | 0.9              | 0.1               | I                |
| Pomelo                   | 92.4      | 4.1            | No  | 72.4          | 14.3           | Yes           | 0.8              | 0.4               | I                |
| Pomelo Rind              | 99.6      | 7.7            | No  | 61.8          | 6.9            | Yes           | 0.8              | 0.4               | I                |
| Potato, Baking           | 93.9      | 16.6           | No  | 36.7          | 2.9            | Yes           | 4.4              | 2.0               | I                |
| Potato, Blue             | 108.2     | 8.7            | No  | 30.3          | 3.0            | Yes           | 5.2              | 2.2               | I                |
| Potato, Red              | 8.3       | 1.3            | Yes | 3.7           | 0.6            | No            | 28.4             | 2.5               | P                |
| Quince                   | 88.6      | 5.3            | No  | 75.9          | 15.2           | No            | 1.5              | 0.9               | I                |
| Raspberry                | 98.2      | 3.6            | No  | 120.6         | 5.6            | Yes           | 0.3              | 0.1               | C                |
| Rosemary                 | 0.6       | 0.3            | Yes |               |                |               |                  |                   |                  |
| Spinach                  | 79.0      | 4.6            | Yes |               |                |               |                  |                   |                  |

**Table S1, continued**

| <b>Extract</b>       | <b>Via.<br/>%</b> | <b>Via.<br/>s.e.m.</b> | <b>*</b> | <b>TEER<br/>% 3 h</b> | <b>TEER<br/>s.e.m.</b> | <b>TEER<br/>Rec.?</b> | <b>Calcein<br/>Ratio</b> | <b>Calcein<br/>s.e.m.</b> | <b>Calcein<br/>Class</b> |
|----------------------|-------------------|------------------------|----------|-----------------------|------------------------|-----------------------|--------------------------|---------------------------|--------------------------|
| Starfruit            | 107.1             | 4.6                    | No       | 13.7                  | 1.5                    | Yes                   | 5.1                      | 0.6                       | P                        |
| Strawberry           | 89.1              | 5.3                    | No       | 17.8                  | 2.9                    | Yes                   | 7.9                      | 0.5                       | P                        |
| Strawberry, White    | 103.8             | 7.3                    | No       | 60.6                  | 17.3                   | Yes                   | 1.6                      | 0.2                       | P                        |
| Sugar Cane           | 102.0             | 3.5                    | No       | 101.8                 | 11.1                   | Yes                   | 4.1                      | 3.3                       | I                        |
| Sweet Potato         | 97.0              | 6.5                    | No       | 99.3                  | 4.7                    | Yes                   | 1.0                      | 0.4                       | I                        |
| Sweet Potato, Purple | 96.0              | 3.8                    | No       | 78.0                  | 5.4                    | No                    | 1.2                      | 0.2                       | I                        |
| Thyme                | 104.8             | 3.8                    | No       | 29.5                  | 4.4                    | Yes                   | 1.8                      | 0.1                       | P                        |
| Tomato, Black        | 88.4              | 10.0                   | No       | 100.5                 | 5.9                    | Yes                   | 0.5                      | 0.1                       | C                        |
| Tomato, Red          | 84.1              | 7.2                    | No       | 89.3                  | 10.2                   | Yes                   | 3.7                      | 0.8                       | P                        |
| Tomato, Yellow       | 81.6              | 8.5                    | No       | 102.4                 | 7.6                    | Yes                   | 1.0                      | 0.2                       | I                        |
| Turmeric             | 6.7               | 3.2                    | Yes      |                       |                        |                       |                          |                           |                          |
| Turnip               | 76.2              | 2.9                    | Yes      |                       |                        |                       |                          |                           |                          |
| Watermelon           | 105.3             | 7.9                    | No       | 117.6                 | 8.0                    | Yes                   | 0.5                      | 0.2                       | I                        |
| Wonderberry          | 0.0               | 0.5                    | Yes      |                       |                        |                       |                          |                           |                          |
| Yautia               | 102.4             | 10.5                   | No       | 91.8                  | 10.8                   | No                    | 0.7                      | 0.1                       | C                        |
| Yucca                | 111.7             | 12.8                   | No       | 104.7                 | 12.5                   | Yes                   | 0.9                      | 0.5                       | I                        |
| Zucchini             | 111.7             | 8.5                    | No       | 81.8                  | 8.1                    | Yes                   | 0.8                      | 0.1                       | I                        |

**Table S2. Parameters for Chromatography Runs.** In each case, solvent A is 0.1 % trifluoroacetic acid (TFA) in water and solvent B is acetonitrile

| <b>MPLC Run <math>\alpha</math></b><br>Column: 26 x 460 mm<br>Starting mass: 1 g Pph |     |     | <b>MPLC Runs <math>\beta, \gamma, \delta, \epsilon</math></b><br>Column: 15 x 920 mm<br>Starting mass: |     |     | <b>UPLC</b><br>Acquity UPLC Column<br>Starting material:<br>10 $\mu$ L MPLC fraction |     |     |
|--------------------------------------------------------------------------------------|-----|-----|--------------------------------------------------------------------------------------------------------|-----|-----|--------------------------------------------------------------------------------------|-----|-----|
| Time (min)                                                                           | % A | % B | $\beta$ : 0.06 g                                                                                       |     |     | Time (min)                                                                           | % A | % B |
| 0.00                                                                                 | 90  | 10  | $\gamma$ : 0.04 g                                                                                      |     |     | 0.00                                                                                 | 90  | 10  |
| 4.87                                                                                 | 90  | 10  | $\delta$ : 0.07 g                                                                                      |     |     | 1.00                                                                                 | 85  | 15  |
| 7.57                                                                                 | 80  | 20  | $\epsilon$ : 0.12 g                                                                                    |     |     | 3.50                                                                                 | 80  | 20  |
| 11.25                                                                                | 80  | 20  | Time (min)                                                                                             | % A | % B | 6.00                                                                                 | 0   | 100 |
| 13.53                                                                                | 70  | 30  | 0.00                                                                                                   | 90  | 10  | 7.00                                                                                 | 0   | 100 |
| 17.50                                                                                | 70  | 30  | 6.05                                                                                                   | 90  | 10  |                                                                                      |     |     |
| 28.40                                                                                | 60  | 40  | 14.93                                                                                                  | 85  | 20  |                                                                                      |     |     |
| 39.12                                                                                | 60  | 40  | 20.98                                                                                                  | 80  | 20  |                                                                                      |     |     |
| 46.93                                                                                | 0   | 100 | 28.65                                                                                                  | 0   | 100 |                                                                                      |     |     |
| 51.00                                                                                | 0   | 100 | 32.31                                                                                                  | 0   | 100 |                                                                                      |     |     |

**Table S3: Primer sequences used for qRT-PCR**

| Gene   | Forward               | Reverse              |
|--------|-----------------------|----------------------|
| BACTIN | CACTGTCTGAGTCGCGTCC   | TCATCCATGGCGAACTGGTG |
| CLDN2  | GAAAGGACGGCTCCGTTTTTC | CAGTGTCTCTGGCAAGCTGA |
| CLDN5  | GTTAAGGCACGGGTAGCACT  | TACTTCTGTGACACCGGCAC |
| ZO1    | CTCTTCAAAGGGAAAACCCGA | GTACTGTGAGGGCAACGGAG |
| JAMA   | TCCCGAGAACGAGTCCATCA  | GAACTTCCACTCCACTCGGG |
